# Supplementary material
Source: ML conference proceedings conference paper supplement (https://proceedings.neurips.cc/paper_files/paper/2022/hash/7e57131fdeb815764434b65162c88895-Abstract.html)
Supplement: Supplementary file 1 [file 7e57131fdeb815764434b65162c88895-Supplemental-Conference.zip]

Archive with 2 entries (2 files):
- code.py
- VISL_Supp.pdf
